# Supplementary figures and images for: [Retracted] Evaluation of Neutrophil‐Lymphocyte Ratio and Platelet‐Lymphocyte Ratio on Predicting Responsiveness to Neoadjuvant Chemoradiotherapy in Locally Advanced Rectal Cancer Patients
Source: Hindawi journal article supplement (doi:10.1155/2022/3839670), 2022-01-01

PLR\_Pre-nCRT

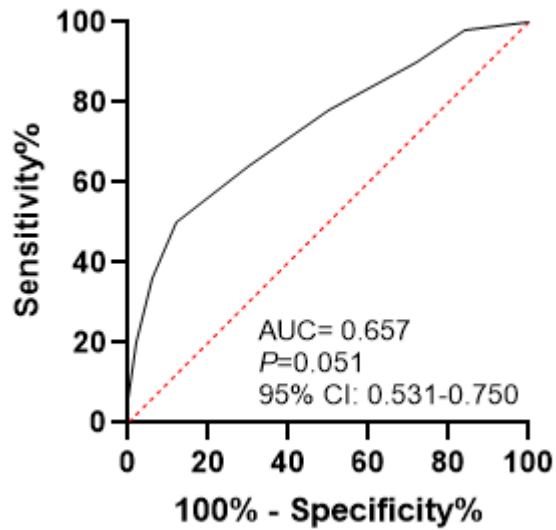

NLR\_Pre-nCRT

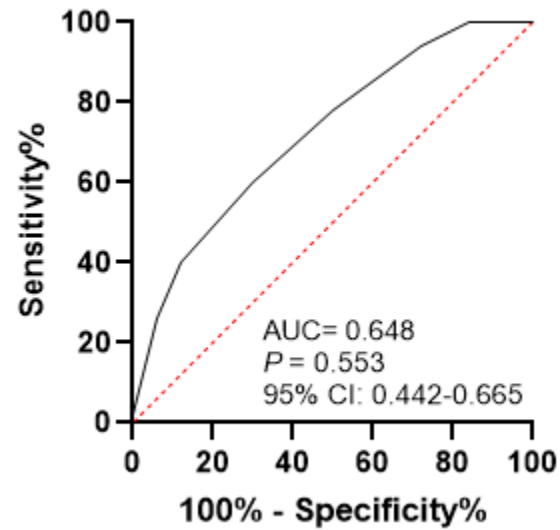

PLR\_Post-nCRT

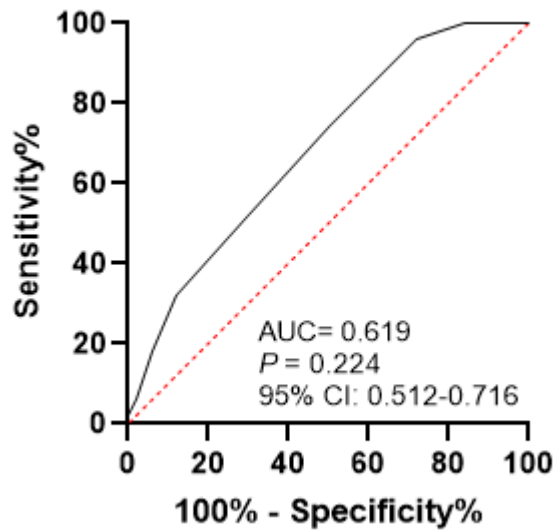

NLR\_Post-nCRT

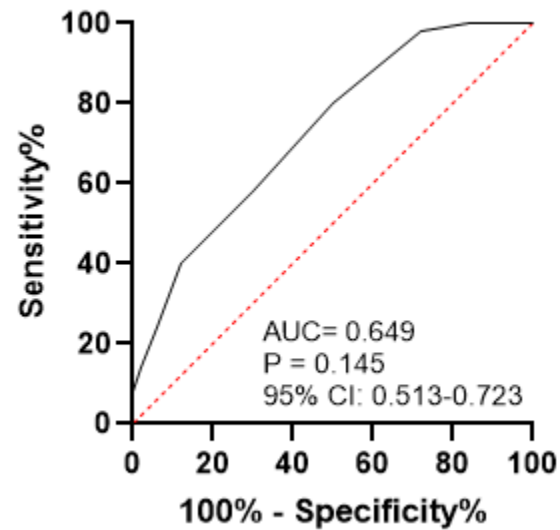

Supplement: f1 [file 3839670.f1.pdf]
